# Supplementary material for: Monitoring early stages of silver particle formation in a polymer solution by in situ and time resolved small angle X-ray scattering
Source: Royal Society of Chemistry journal article supplement (doi:10.1039/c0nr00390e), 2010-01-01
Supplement: c0nr00390e.pdf [file c0nr00390e.pdf]

## Supporting information

The different time regions  $\Delta t_1$ ,  $\Delta t_2$ ,  $\Delta t_3$  found by SAXS data analysis can be preliminarily distinguished upon inspection of the integrated intensity given by  $\int_0^{\infty} I(q) dq$  as a function of time.

We observe a different power law behavior in each of the three time ranges, as indicated by lines in Fig. 1; furthermore, we find the same power exponent 1.2 in the nucleation regions  $\Delta t_1$  and  $\Delta t_3$ , and a different power exponent 3.9 in the growth region  $\Delta t_2$ .

The *log-normal* distribution  $P(R)$  of *particle size* used in Eq. 4, is defined by

$$P(R) = \frac{1}{Rs\sqrt{2\pi}} \exp - \frac{(\ln R - \rho)^2}{2s^2}, \text{ with } \int_0^{\infty} P(R) dR = 1 \quad (1)$$

where  $\rho$  and  $s$  are the mean and the standard deviation values, respectively, of the distribution of the variable's natural logarithm; so, the mean and the standard deviation  $R_m$  and  $\sigma$  of the  $R$  distribution are given by

$$R_m = \exp(\rho + 12s^2) \text{ and } \sigma = R_m (e^{s^2} - 1). \quad (2)$$

The interference term  $S(q, R_{HS}, \eta)$  for a hard sphere model in monodisperse approximation was calculated with the Percus-Yevick equation:

$$S(q, R_{HS}, \eta) = \frac{1}{[1 + 24\eta A(2qR_{HS})]} \quad (3)$$

with

$$A(x) = \int_0^1 y^2 (a + by + cy^3) \frac{\sin(yx)}{yx} dy \quad (4)$$

and

$$a = \frac{(1 + 2\eta)^2}{(1 - \eta)^4}; b = \frac{-6\eta(1 + \eta)^2}{(1 - \eta)^4}; c = \frac{a\eta}{2} \quad (5)$$

$R_{HS}$  and  $\eta$  are the hard sphere radius hard sphere volume fraction, respectively.

In Fig. 2 the reduced standard deviations (*rsd*)  $\Delta N/N$ ,  $\Delta R_m/R_m$ ,  $\Delta\sigma/\sigma$ ,  $\Delta R_{HS}/R_{HS}$ ,  $\Delta\eta/\eta$ ,  $\Delta P_E/P_E$ ,  $\Delta P_C/P_C$  of all estimated parameters are plotted as a function of the time. For  $t < t_0$ ,  $\Delta N/N$ ,  $\Delta R_m/R_m$ ,  $\Delta\sigma/\sigma$ ,  $\Delta R_{HS}/R_{HS}$  and  $\Delta\eta/\eta$  are quite large and assume values larger than 1 indicating that the model of Eq. 2 cannot be applied to the analysis of the SAXS profiles before the addition of ascorbic acid. In this time range fitting procedure converges taking as a model the power law background  $I_B(q)$ ; indeed, only  $\Delta P_E/P_E$  and  $\Delta P_C/P_C$  *rsd* assume small reasonable values as indicated in Fig. 2. As the reaction takes place, all the *rsd* reach the small value of 0.1 in the  $\Delta t_1$  range and thus the model of Eq. 2 takes to work in SAXS patterns analysis; in particular the fitting procedure converge when  $t > t^*$ . We also stress here that Eq. 2 has been derived considering the interference effects due to monodisperse hard spheres; in our case this is verified since reduced standard deviation of  $R_{HS}$  assumes sufficiently small values as the reaction takes place and goes on. Finally, we note that at  $t \approx 170$ s our main interference peak falls outside the measured  $q$  range; anyway the higher order maxima and minima falling in our range, joint to the use of constrains setting a lower limit for  $R_{HS}$  values, allow us to yield converging fits of experimental data with *rsd* of  $R_{HS}$  and  $\eta$  that remain less than 0.1, as shown in Fig. 2.

In Fig. 3 we show the  $I_B(q)$  and  $I_P(q)$  obtained from the optimization procedure, while all different contributions in the model (Eq. 2) are reported in the Fig. 4, where also the log-normal size distributions at two different time intervals are illustrated.

**Figures:**

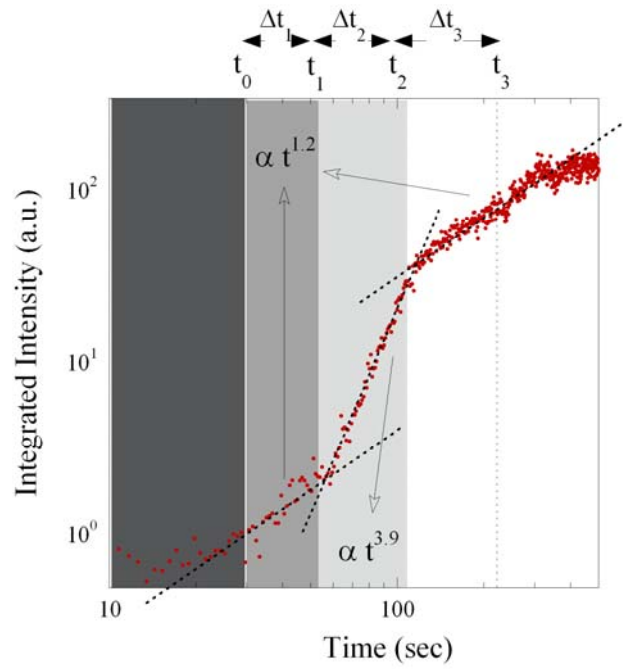

**Figure 1:** Log-Log plot of integrated intensity vs. time; different power law behaviours (continuous lines) characterize the different time regions  $\Delta t_1=[t_1-t_0]$ ,  $\Delta t_2=[t_2-t_1]$  and  $\Delta t_3=[t_3-t_2]$ .

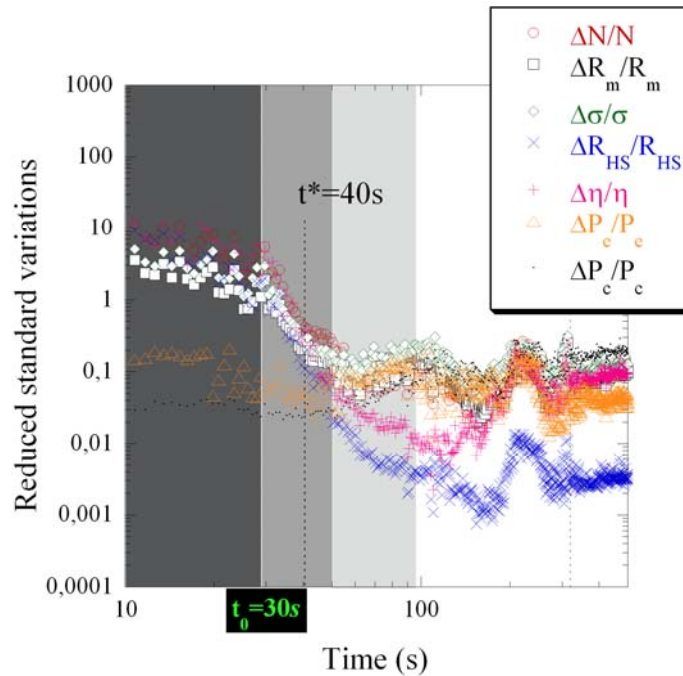

**Figure 2:** Plot of reduced standard deviations,  $rds$ , of variable parameters in the fitting procedure; for  $t < t^*$ , we find large uncertainties of  $N$ ,  $R_m$ ,  $\sigma$ ,  $R_{HS}$ , and  $\eta$  variable parameters, meaning the failure of Eq. 2 in modelling experimental data; here the only power law term of Eq 2 gives small  $rds$   $\Delta P_E/P_E$  and  $\Delta P_C/P_C$ . After  $t^*$ , the  $rds$  oscillate around reasonable small values.

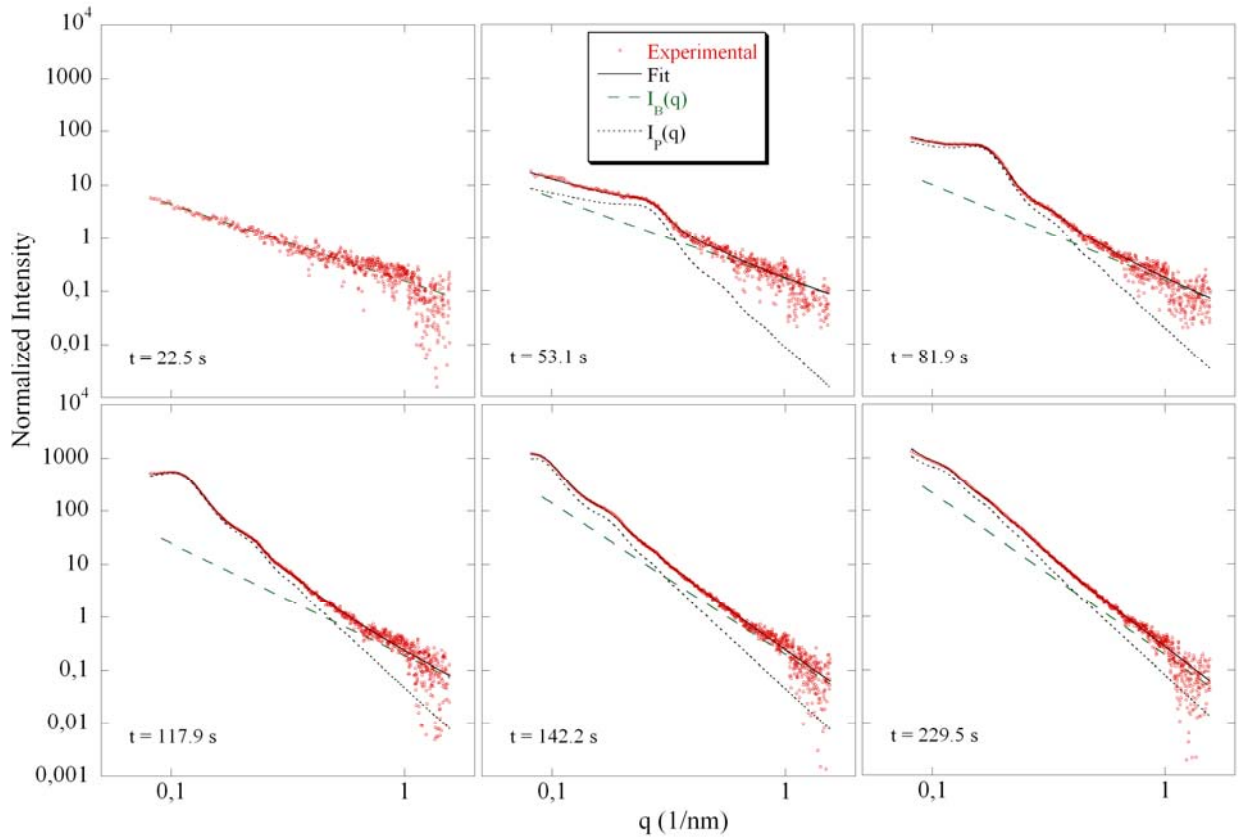

**Figure 3:** SAXS normalized profiles (dots) collected at the time intervals indicated; solid lines show the best-fitted curves obtained by Eq. 2, while dashed and dotted lines represent the calculated  $I_B(q)$  and  $I_P(q)$  respectively.

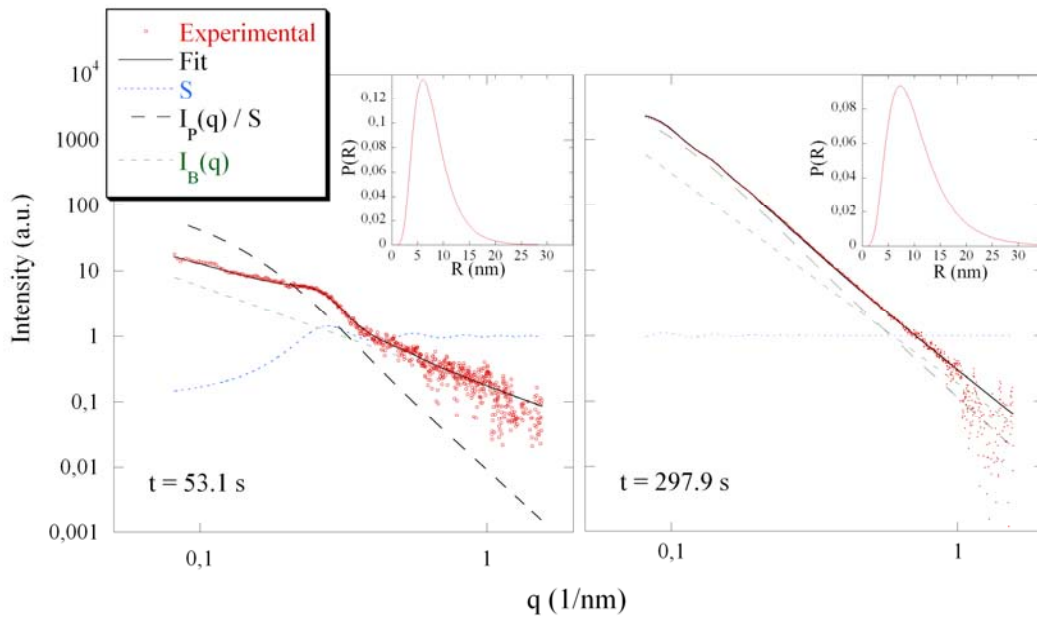

**Figure 4:** SAXS experimental profiles (red dots) collected at the time intervals indicated along the best-fitted curves (solid lines) obtained by Eq. 1. We also represent: the Percus-Yevick structure factor, the power law contribution  $I_B(q)$

and the integral  $I_P(q)/S = Cn \int_0^{\infty} P(R) [V(R)\Phi(q, R)]^2 dR$ . The log-normal size distributions, are reported in the insets.
